# Supplementary material
Source: PubMed Central journal article supplement (PMC3406693)
Supplement: supp_M112.383034_jbc.M112.383034-1.pdf [file supp_M112.383034_jbc.M112.383034-1.pdf]

**Supplemental Table. The effects of copper sulfate and silver nitrate on ethylene-binding activity in subfamily II members of the ethylene receptor family from *Arabidopsis* and empty vector.** Ethylene binding to equal amounts of yeast membranes isolated from yeast cells expressing the binding domain of each subfamily II receptor isoform fused to GST or empty vector are compared between samples treated with  $^{14}\text{C}_2\text{H}_4$  (0.1  $\mu\text{l/l}$ ) and identical samples treated with  $^{14}\text{C}_2\text{H}_4$  (0.1  $\mu\text{l/l}$ ) plus  $^{12}\text{C}_2\text{H}_4$  (1000  $\mu\text{l/l}$ ). Samples were pre-incubated for 30 min with either 300  $\mu\text{M}$  copper sulfate, silver nitrate or no metal. Displaceable ethylene binding was determined by subtracting the amount of  $^{14}\text{C}_2\text{H}_4$  bound in the presence of excess  $^{12}\text{C}_2\text{H}_4$  from the amount of  $^{14}\text{C}_2\text{H}_4$  in the absence of added  $^{12}\text{C}_2\text{H}_4$ . Data shows the mean counts per minute  $\pm$  SD

|                 | $^{14}\text{C}_2\text{H}_4$ Bound (counts per minute) |                 |                 |
|-----------------|-------------------------------------------------------|-----------------|-----------------|
|                 | no metal                                              | $\text{CuSO}_4$ | $\text{AgNO}_3$ |
| pPICZ           | $1 \pm 2$                                             | $0 \pm 1$       | $5 \pm 2$       |
| ETR2[1-157]-GST | $22 \pm 6$                                            | $1076 \pm 134$  | $8 \pm 6$       |
| ERS2[1-160]-GST | $-2 \pm 3$                                            | $654 \pm 86$    | $-2 \pm 3$      |
| EIN4[1-151]-GST | $4 \pm 3$                                             | $363 \pm 28$    | $8 \pm 3$       |
